# Supplementary material for: Different molecular patterns in glioblastoma multiforme subtypes upon recurrence
Source: Springer Nature journal article supplement (doi:10.1007/s11060-009-9967-4), 2009-07-30
Supplement: MOESM1 [file 8947562]

**Supplementary Table 1:** Results of the semiquantitative PCR analysis of *EGFR* amplification. We calculated the *EGFR/CFTR* ratios [ $x$ ] from peripheral blood DNA of 20 healthy Caucasian adults. For tumor samples, a value [ $x+3SD= 2.3$ ] was considered as the cut-off level for the normal gene copy number. Ratios higher than [ $x+3SD$ ] were regarded as evidence of more than 2 copies of the *EGFR* gene.

|      | <b><i>EGFR/CFTR</i><br/>ratios</b> |
|------|------------------------------------|
| G1p  | 5.9                                |
| G1r  | 6.9                                |
| G2p  | 2.2                                |
| G2r  | 19.3                               |
| G3p  | 1.5                                |
| G3r  | 1.6                                |
| G4p  | 14.2                               |
| G4r  | 15.9                               |
| G5p  | 3.5                                |
| G5r  | 4.1                                |
| G6p  | 1.5                                |
| G6r  | 8.7                                |
| G7p  | 1.1                                |
| G7r  | 1.5                                |
| G8p  | 1.6                                |
| G8r  | 9.1                                |
| G9p  | 1.6                                |
| G9r  | 9.9                                |
| G10p | 6.5                                |
| G10r | 9.1                                |
| G11p | 3.8                                |
| G11r | 8.3                                |
| G12p | 14.4                               |
| G12r | 20.1                               |
| G13p | 3.6                                |
| G13r | 4.7                                |
| G14p | 1.3                                |
| G14r | 1.4                                |
| G15p | 9.6                                |
| G15r | 9.9                                |
| G16p | 1.3                                |
| G16r | 1.6                                |
| G17p | 4.4                                |
| G17r | 5.1                                |
| G18p | 3.2                                |
| G18r | 3.7                                |
| G19p | 8.3                                |
| G19r | 8.6                                |
| G20p | 10.2                               |
| G20r | 12.2                               |
